# Supplementary material
Source: PubMed Central journal article supplement (PMC7116742)
Supplement: EMS114908-supplement-Supplementary_Tables_1_12.pdf [file EMS114908-supplement-Supplementary_Tables_1_12.pdf]

**Supplementary Table 1: Targeted gene expression profile in the corpus callosum following cuprizone**  
**Related to figure 1**

| Targeted expression profile in the corpus callosum |                                       |      |      |       |                            |             |              |              |           |            |            |            |            |             |  |
|----------------------------------------------------|---------------------------------------|------|------|-------|----------------------------|-------------|--------------|--------------|-----------|------------|------------|------------|------------|-------------|--|
| Gene symbol                                        | Fold expression to untreated controls |      |      |       | P-Value (Student's t-test) |             |              |              |           |            |            |            |            |             |  |
|                                                    | 5w                                    | 6w   | 12w  | +2w   | Ctrl vs. 5w                | Ctrl vs. 6w | Ctrl vs. 12w | Ctrl vs. +2w | 5w vs. 6w | 5w vs. 12w | 5w vs. +2w | 6w vs. 12w | 6w vs. +2w | 12w vs. +2w |  |
| <i>Hmgcr</i>                                       | 0.18                                  | 0.29 | 0.59 | 0.77  | 0.00                       | 0.01        | 0.05         | 0.37         | 0.04      | 0.01       | 0.01       | 0.04       | 0.03       | 0.05        |  |
| <i>Fdft1</i>                                       | 0.27                                  | 0.36 | 0.56 | 0.92  | 0.00                       | 0.00        | 0.05         | 0.91         | 0.08      | 0.04       | 0.02       | 0.18       | 0.03       | 0.04        |  |
| <i>Cyp51</i>                                       | 0.19                                  | 0.15 | 0.44 | 0.79  | 0.01                       | 0.01        | 0.05         | 0.10         | 0.69      | 0.03       | 0.08       | 0.07       | 0.13       | 0.90        |  |
| <i>Dhcr24</i>                                      | 0.20                                  | 0.31 | 0.54 | 1.50  | 0.00                       | 0.00        | 0.03         | 0.02         | 0.19      | 0.06       | 0.00       | 0.31       | 0.00       | 0.01        |  |
| <i>Ldlr</i>                                        | 0.24                                  | 0.11 | 0.47 | 1.68  | 0.03                       | 0.01        | 0.07         | 0.57         | 0.05      | 0.03       | 0.19       | 0.00       | 0.15       | 0.30        |  |
| <i>Vldlr</i>                                       | 0.35                                  | 0.34 | 0.79 | 0.96  | 0.03                       | 0.06        | 0.36         | 1.00         | 1.00      | 0.01       | 0.22       | 0.02       | 0.23       | 0.88        |  |
| <i>Apobr</i>                                       | 3.20                                  | 5.32 | 5.00 | 10.40 | 0.05                       | 0.00        | 0.02         | 0.15         | 0.03      | 0.12       | 0.33       | 0.96       | 0.48       | 0.48        |  |
| <i>Scarb1</i>                                      | 1.26                                  | 0.63 | 0.24 | 0.79  | 0.99                       | 0.13        | 0.01         | 0.87         | 0.89      | 0.66       | 0.96       | 0.01       | 0.81       | 0.22        |  |
| <i>Lrp1</i>                                        | 1.12                                  | 1.79 | 1.07 | 8.88  | 0.96                       | 0.47        | 0.55         | 0.00         | 0.74      | 1.00       | 0.01       | 0.57       | 0.00       | 0.00        |  |
| <i>Tspo</i>                                        | 7.85                                  | 8.25 | 1.79 | 2.13  | 0.07                       | 0.01        | 0.15         | 0.78         | 1.00      | 0.07       | 0.29       | 0.01       | 0.13       | 1.00        |  |
| <i>Pltp</i>                                        | 1.33                                  | 0.85 | 1.27 | 2.12  | 0.40                       | 0.91        | 0.09         | 0.04         | 0.38      | 1.00       | 0.15       | 0.49       | 0.00       | 0.14        |  |
| <i>Apoe</i>                                        | 5.16                                  | 2.77 | 1.23 | 1.22  | 0.10                       | 0.01        | 0.45         | 0.97         | 0.28      | 0.11       | 0.13       | 0.00       | 0.02       | 1.00        |  |
| <i>Clu</i>                                         | 2.17                                  | 0.60 | 1.20 | 1.57  | 0.15                       | 0.07        | 0.67         | 0.41         | 0.09      | 0.30       | 0.64       | 0.05       | 0.07       | 0.73        |  |
| <i>Apoa1</i>                                       | 0.54                                  | 4.90 | 0.61 | 7.64  | 0.15                       | 0.32        | 0.28         | 0.09         | 0.29      | 0.92       | 0.08       | 0.30       | 0.28       | 0.09        |  |
| <i>Lcat</i>                                        | 0.12                                  | 0.70 | 0.03 | 1.36  | 0.00                       | 0.12        | 0.00         | 0.23         | 0.02      | 0.04       | 0.02       | 0.01       | 0.14       | 0.02        |  |
| <i>Abca1</i>                                       | 17.63                                 | 6.74 | 3.29 | 8.96  | 0.01                       | 0.15        | 0.03         | 0.03         | 0.04      | 0.01       | 0.00       | 0.36       | 0.69       | 0.05        |  |
| <i>Abcg1</i>                                       | 1.93                                  | 1.70 | 1.18 | 4.17  | 0.00                       | 0.11        | 0.95         | 0.00         | 0.82      | 0.12       | 0.00       | 0.53       | 0.00       | 0.01        |  |
| <i>Abcg4</i>                                       | 0.82                                  | 0.54 | 1.38 | 1.86  | 0.00                       | 0.11        | 0.95         | 0.00         | 0.82      | 0.12       | 0.00       | 0.53       | 0.00       | 0.01        |  |
| <i>Soat1</i>                                       | 0.86                                  | 2.24 | 0.82 | 0.87  | 0.99                       | 0.09        | 0.16         | 0.21         | 0.36      | 1.00       | 1.00       | 0.09       | 0.05       | 0.98        |  |
| <i>Nceh1</i>                                       | 1.18                                  | 5.70 | 2.23 | 0.86  | 0.58                       | 0.03        | 0.27         | 0.65         | 0.04      | 0.45       | 0.50       | 0.14       | 0.02       | 0.22        |  |
| <i>Npc1</i>                                        | 1.92                                  | 3.61 | 1.84 | 1.22  | 0.01                       | 0.08        | 0.12         | 0.78         | 0.21      | 0.98       | 0.17       | 0.30       | 0.06       | 0.53        |  |
| <i>Npc2</i>                                        | 5.43                                  | 3.95 | 2.30 | 6.89  | 0.02                       | 0.02        | 0.12         | 0.03         | 0.46      | 0.14       | 0.64       | 0.13       | 0.17       | 0.08        |  |
| <i>Cyp46a1</i>                                     | 0.14                                  | 0.22 | 0.59 | 1.42  | 0.00                       | 0.00        | 0.08         | 0.42         | 0.14      | 0.09       | 0.03       | 0.09       | 0.03       | 0.12        |  |
| <i>Ch27a1</i>                                      | 1.71                                  | 0.63 | 0.22 | 0.83  | 0.67                       | 0.11        | 0.00         | 0.23         | 0.44      | 0.25       | 0.59       | 0.04       | 0.36       | 0.00        |  |
| <i>Ch25h</i>                                       | 70.56                                 | 7.44 | 1.35 | 5.22  | 0.41                       | 0.11        | 0.93         | 0.10         | 0.50      | 0.41       | 0.45       | 0.13       | 0.87       | 0.11        |  |

**Supplementary Table 2: Targeted sterol gene expression profile in isolated cells of untreated mice**  
**Related to figure 1**

| Targeted expression profile in isolated cells |                                      |            |            |            |
|-----------------------------------------------|--------------------------------------|------------|------------|------------|
| Gene symbol                                   | Mean expression ( $2^{-\Delta CT}$ ) |            |            |            |
|                                               | OL                                   | A          | M          | EC         |
| <i>Hmgcr</i>                                  | 0.00185131                           | 0.00340585 | 0.00007785 | 0.00025608 |
| <i>Fdft1</i>                                  | 0.00252692                           | 0.00249386 | 0.00006067 | 0.00022896 |
| <i>Cyp51</i>                                  | 0.00167273                           | 0.00069921 | 0.00000911 | 0.00008611 |
| <i>Dhcr24</i>                                 | 0.00657979                           | 0.00438422 | 0.00001925 | 0.00025997 |
| <i>Ldlr</i>                                   | 0.00007158                           | 0.00021110 | 0.00000130 | 0.00003656 |
| <i>Vldlr</i>                                  | 0.00387669                           | 0.00031833 | 0.00000635 | 0.00002702 |
| <i>Scarbl</i>                                 | 0.00004549                           | 0.00010977 | 0.00007789 | 0.00001088 |
| <i>CD36</i>                                   | 0.00000337                           | 0.00000586 | 0.00002392 | 0.00049891 |
| <i>Lrp1</i>                                   | 0.00008158                           | 0.00003199 | 0.00008775 | 0.00006137 |
| <i>Tspo</i>                                   | 0.00003135                           | 0.00008258 | 0.00003689 | 0.00000030 |
| <i>Pltp</i>                                   | 0.00426978                           | 0.03506886 | 0.00195897 | 0.00004228 |
| <i>ApoE</i>                                   | 0.00459414                           | 0.01388507 | 0.00351643 | 0.00189860 |
| <i>Clu</i>                                    | 0.00376362                           | 0.00731472 | 0.00005575 | 0.00189860 |
| <i>Apod</i>                                   | 0.13612923                           | 0.00336636 | 0.00027997 | 0.00124774 |
| <i>ApoA1</i>                                  | 0.00000149                           | 0.00000301 | 0.00000699 | 0.00329111 |
| <i>Lcat</i>                                   | 0.00022748                           | 0.00059168 | 0.00012503 | 0.00005685 |
| <i>Abca1</i>                                  | 0.00017157                           | 0.00285070 | 0.00000841 | 0.05043125 |
| <i>Abcg1</i>                                  | 0.00009913                           | 0.00004952 | 0.00003859 | 0.00018880 |
| <i>Abcg4</i>                                  | 0.00006157                           | 0.00013694 | 0.00000052 | 0.00000194 |
| <i>Soat1</i>                                  | 0.00000964                           | 0.00001264 | 0.00022252 | 0.00000559 |
| <i>Nceh1</i>                                  | 0.00002482                           | 0.00020923 | 0.00012503 | 0.00031717 |
| <i>Npc1</i>                                   | 0.00007943                           | 0.00038931 | 0.00000112 | 0.00030702 |
| <i>Npc2</i>                                   | 0.00583792                           | 0.00696956 | 0.00047487 | 0.00071298 |
| <i>Cyp46a1</i>                                | 0.00000004                           | 0.00000824 | 0.00000015 | 0.00000113 |
| <i>Cyp27a1</i>                                | 0.00000855                           | 0.00007471 | 0.00000004 | 0.00000002 |
| <i>Ch25h</i>                                  | 0.00000121                           | 0.00001778 | 0.00002256 | 0.00000387 |

**Supplementary Table 3: Targeted gene expression profile in isolated cells following cuprizone**  
**Related to figure 1**

| Targeted expression profile in isolated cells |                      |       |       |        |                         |      |       |      |                            |                 |               |               |                |              |               |                |              |                |                 |               |
|-----------------------------------------------|----------------------|-------|-------|--------|-------------------------|------|-------|------|----------------------------|-----------------|---------------|---------------|----------------|--------------|---------------|----------------|--------------|----------------|-----------------|---------------|
| Gene symbol                                   | Fold expression (6w) |       |       |        | Fold expression (12+2w) |      |       |      | P-Value (Student's t-test) |                 |               |               |                |              |               |                |              |                |                 |               |
|                                               | OL                   | A     | M     | EC     | OL                      | A    | M     | EC   | OL Ctrl vs. 6w             | OL Ctrl vs. +2w | OL 6w vs. +2w | A Ctrl vs. 6w | A Ctrl vs. +2w | A 6w vs. +2w | M Ctrl vs. 6w | M Ctrl vs. +2w | M 6w vs. +2w | EC Ctrl vs. 6w | EC Ctrl vs. +2w | EC 6w vs. +2w |
| <i>Hmgcr</i>                                  | 0.72                 | 0.08  | 2.60  | 0.66   | 3.05                    | 0.25 | 0.95  | 0.59 | 0.02                       | 0.03            | 0.02          | 0.00          | 0.00           | 0.04         | 0.03          | 0.85           | 0.04         | 0.16           | 0.20            | 0.98          |
| <i>Fdft1</i>                                  | 0.25                 | 0.07  | 1.20  | 1.06   | 1.80                    | 0.09 | 1.04  | 0.17 | 0.01                       | 0.01            | 0.00          | 0.00          | 0.00           | 0.84         | 0.39          | 0.82           | 0.52         | 0.74           | 0.00            | 0.00          |
| <i>Cyp51</i>                                  | 0.42                 | 0.08  | 3.12  | 0.77   | 1.93                    | 0.30 | 0.94  | 0.38 | 0.03                       | 0.21            | 0.04          | 0.00          | 0.00           | 0.00         | 0.00          | 0.87           | 0.01         | 0.15           | 0.03            | 0.27          |
| <i>Dhcr24</i>                                 | 0.28                 | 0.05  | 0.21  | 1.06   | 2.64                    | 0.05 | 0.17  | 0.22 | 0.00                       | 0.05            | 0.02          | 0.02          | 0.02           | 0.81         | 0.02          | 0.00           | 0.73         | 0.34           | 0.09            | 0.02          |
| <i>Ldlr</i>                                   | 0.37                 | 0.03  | 3.29  | 0.03   | 5.10                    | 0.12 | 0.97  | 0.06 | 0.04                       | 0.05            | 0.02          | 0.00          | 0.00           | 0.07         | 0.12          | 0.93           | 0.08         | 0.00           | 0.00            | 0.80          |
| <i>Vldlr</i>                                  | 0.34                 | 0.44  | 4.16  | 1.02   | 0.59                    | 0.19 | 0.78  | 0.13 | 0.03                       | 0.17            | 0.22          | 0.02          | 0.01           | 0.01         | 0.03          | 0.43           | 0.05         | 0.65           | 0.04            | 0.08          |
| <i>Scarbl</i>                                 | 0.61                 | 0.72  | 1.16  | 0.22   | 0.97                    | 0.43 | 0.94  | 0.49 | 0.27                       | 0.97            | 0.53          | 0.31          | 0.02           | 0.36         | 0.36          | 0.73           | 0.61         | 0.00           | 0.01            | 0.09          |
| <i>CD36</i>                                   | 6.64                 | 8.16  | 4.79  | 0.00   | 4.25                    | 1.56 | 2.46  | NA   | 0.10                       | 0.05            | 0.35          | 0.15          | 0.01           | 0.19         | 0.00          | 0.07           | 0.04         | 0.75           | NA              | NA            |
| <i>Lrp1</i>                                   | 1.53                 | 0.43  | 3.78  | 1.06   | 3.41                    | 0.94 | 0.81  | 0.06 | 0.48                       | 0.31            | 0.35          | 0.01          | 0.01           | 1.00         | 0.01          | 0.45           | 0.00         | 0.82           | 0.00            | 0.00          |
| <i>Tspo</i>                                   | 1.98                 | 1.16  | 1.12  | 4.66   | 4.51                    | 1.17 | 2.65  | 2.58 | 0.42                       | 0.15            | 0.16          | 0.68          | 0.68           | 1.00         | 0.40          | 0.09           | 0.09         | 0.01           | 0.15            | 0.25          |
| <i>Pltp</i>                                   | 0.25                 | 0.15  | 0.76  | 0.24   | 0.98                    | 0.17 | 0.22  | 0.31 | 0.00                       | 0.98            | 0.26          | 0.01          | 0.01           | 1.00         | 0.14          | 0.00           | 0.03         | 0.00           | 0.00            | 0.47          |
| <i>ApoE</i>                                   | 7.95                 | 7.56  | 44.36 | 20.46  | 5.41                    | 0.52 | 19.92 | 0.31 | 0.00                       | 0.02            | 0.29          | 0.01          | 0.01           | 1.00         | 0.01          | 0.00           | 0.06         | 0.00           | 0.86            | 0.00          |
| <i>Clu</i>                                    | 0.71                 | 2.57  | 2.95  | 1.11   | 3.01                    | 0.28 | 0.19  | 0.29 | 0.15                       | 0.33            | 0.25          | 0.01          | 0.01           | 1.00         | 0.22          | 0.05           | 0.15         | 0.70           | 0.06            | 0.03          |
| <i>Apod</i>                                   | 0.44                 | 0.43  | 0.22  | 0.78   | 0.62                    | 0.25 | 0.39  | 0.93 | 0.06                       | 0.00            | 0.33          | 0.43          | 0.43           | 1.00         | 0.03          | 0.03           | 0.04         | 0.16           | 0.70            | 0.32          |
| <i>ApoA1</i>                                  | 1.12                 | 0.71  | 0.25  | 0.00   | 2.60                    | 4.51 | 0.72  | 0.58 | 0.69                       | 0.01            | 0.02          | 0.00          | 0.00           | 1.00         | 0.13          | 0.09           | 0.25         | 0.01           | 0.21            | 0.10          |
| <i>Lcat</i>                                   | 0.11                 | 0.06  | 0.00  | 8.22   | 1.17                    | 0.02 | 1.47  | NA   | 0.00                       | 0.56            | 0.03          | 0.00          | 0.00           | 1.00         | 0.01          | 0.41           | 0.07         | 0.03           | NA              | NA            |
| <i>Abca1</i>                                  | 0.86                 | 0.15  | 36.46 | 0.05   | 0.84                    | 0.63 | 4.40  | 0.00 | 0.71                       | 0.42            | 0.99          | 0.06          | 0.06           | 1.00         | 0.04          | 0.04           | 0.04         | 0.00           | 0.00            | 0.50          |
| <i>Abcg1</i>                                  | 0.42                 | 0.45  | 2.44  | 1.97   | 3.00                    | 0.83 | 1.02  | 0.02 | 0.02                       | 0.03            | 0.02          | 0.00          | 0.00           | 0.90         | 0.14          | 0.94           | 0.11         | 0.00           | 0.93            | 0.00          |
| <i>Abcg4</i>                                  | 0.39                 | 0.41  | 0.18  | 3.42   | 1.08                    | 0.09 | 0.41  | 0.10 | 0.15                       | 0.85            | 0.10          | 0.37          | 0.37           | 1.00         | 0.00          | 0.00           | 1.00         | 0.25           | 0.03            | 0.19          |
| <i>Soat1</i>                                  | 0.37                 | 0.85  | 5.08  | 1.67   | 0.91                    | 0.55 | 0.94  | 0.82 | 0.02                       | 0.73            | 0.01          | 0.05          | 0.05           | 1.00         | 0.01          | 0.85           | 0.00         | 0.05           | 0.53            | 0.02          |
| <i>Nceh1</i>                                  | 3.20                 | 2.81  | 19.38 | 0.51   | 0.70                    | 0.80 | 3.28  | 0.36 | 0.06                       | 0.03            | 0.03          | 0.00          | 0.00           | 1.00         | 0.01          | 0.05           | 0.03         | 0.09           | 0.06            | 0.69          |
| <i>Npc1</i>                                   | 0.22                 | 0.11  | 2.99  | 0.43   | 0.36                    | 0.34 | 0.81  | 0.36 | 0.00                       | 0.01            | 0.15          | 0.00          | 0.00           | 1.00         | 0.06          | 0.34           | 0.03         | 0.05           | 0.03            | 0.57          |
| <i>Npc2</i>                                   | 0.86                 | 2.16  | 3.41  | 0.95   | 2.06                    | 2.17 | 1.48  | 0.31 | 0.45                       | 0.01            | 0.02          | 0.00          | 0.00           | 1.00         | 0.03          | 0.03           | 0.03         | 0.82           | 0.10            | 0.14          |
| <i>Cyp46a1</i>                                | 0.46                 | 0.12  | 4.02  | 0.00   | 0.95                    | 0.29 | 1.09  | 0.04 | 0.16                       | 0.90            | 0.15          | 0.65          | 0.65           | 1.00         | 0.07          | 0.96           | 0.06         | 0.03           | 0.05            | 0.93          |
| <i>Ch27a1</i>                                 | 21.33                | 1.48  | 2.07  | 164.29 | 3.48                    | 3.35 | 1.06  | 6.54 | 0.06                       | 0.07            | 0.09          | 0.09          | 0.09           | 1.00         | 0.02          | 0.90           | 0.02         | 0.00           | 0.53            | 0.01          |
| <i>Ch25h</i>                                  | 0.06                 | 21.84 | 2.41  | 0.53   | 1.06                    | 7.41 | 0.48  | 0.76 | 0.04                       | 0.90            | 0.01          | 0.00          | 0.00           | 0.04         | 0.14          | 0.31           | 0.00         | 0.17           | 0.57            | 0.43          |

## Supplementary Table 4: List of primer sequences, Related to figures 1-7

All primers used for expression analysis were intron-spanning.

| Gene                   | Sequence (5'-3'; forward - reverse)                   |
|------------------------|-------------------------------------------------------|
| <i>Hprt</i>            | TCCTCCTCAGACCGCTTTT - CCTGGTTCATCATCGCTAATC           |
| <i>Rplp0</i>           | GATGCCAGGGAAGACAG - ACAATGAAGCATTTTGGATAATCA          |
| <i>Rps13</i>           | CGAAAGCACCTTGAGAGGAA -TTCCAATTAGGTGGGAGCAC            |
| <i>18S</i>             | AAATCAGTTATGGTTCCTTTGGTC - GCTCTAGAATTACCACAGTTATCCAA |
| <i>Gapdh</i>           | CTACATGGTCTACATGTTCCAGTA - TGATGGCATGGACTGTGGTCAT     |
| <i>Car2</i>            | CAAGCAACAACGGACCAGA - ATGAGCAGAGGCTGTAGG              |
| <i>Olig2</i>           | AGACCGACCAACACCAG - AAGCTCTCGAATGATCCTTCTTT           |
| <i>Plp1</i>            | TCAGTCTATTGCCTTCCCTAGC - AGCATTCCATGGGAGAACAC         |
| <i>Cspg4</i>           | TCATACAGAATGTTCCAGCA - GCAGAGGAGGTCTTGGTGAA           |
| <i>Pdgfra</i>          | CTCTTGGAGATAGACTCCGTAG - ACTTCTCTTCTGCGAATGG          |
| <i>Gfap</i>            | TGCTCCTGCTTCGAGTCCTT - CAAGAGGAACATCGTGGTAAAGA        |
| <i>Aqp4</i>            | TGGAGGATTGGGAGTCACC - TGAACACCAACTGGAAAGTGA           |
| <i>S100b</i>           | AACAACGAGCTCTCTCACTTCC - CTCCATCACTTTGTCCACCA         |
| <i>Aif1</i>            | TGTTTTTCTCCTCATACATCAGAATC - CCGAGGAGACGTTTCAGCTAC    |
| <i>Lamp2</i>           | AAGGTGCAACCTTTTAATGTGAC - TGTCATCATCCAGCGAACAC        |
| <i>Hmgc1</i>           | GGACCGCTGCTATTCTGTCT - AGCCAAAATCATTTCAGGGTAAA        |
| <i>Hmgcr</i>           | TGATTGGAGTTGGACCACAT - TGGCCAACACTGACATGC             |
| <i>Fdft1</i>           | CCAAACAGGACTGGGACAAG - GACGAGAAAAGGCCAATTC            |
| <i>Dhcr24</i>          | GGTCATGACGGACGACGTA - AGGGCTTGTAGTAACTGCCAAT          |
| <i>Cyp51</i>           | TTAGAACAGAAAAGCAGTGTGTGG - TGCATCTATCAAGTAAATTCAGATCC |
| <i>Mvk</i>             | CTCAAGGACGGGGTCTCC - GGCCCACTTGTTGATTGACT             |
| <i>ApoE</i>            | GACCCTGGAGGCTAAGGACT - AGAGCCTTCATCTTCGCAAT           |
| <i>Apod</i>            | ACGGAAACATCGAAGTGCTAA - TGGCTTCACCCTTTACTTGG          |
| <i>Clu</i>             | GCCATGGATGCCAGCTC - CACACAGTGCGGTCATCTTC              |
| <i>Apoa1</i>           | TCAGGATGAAAGCTGTGGTG - TCATCTTGCTGCCATACGTG           |
| <i>Ldlr</i>            | GATGGCTATACCTACCCCTCAA - TGTCATGCCACATCGTC            |
| <i>Vldlr</i>           | AAGTCAGTGTTCGCCAAAA - TGCTGCCATCACTAAGAGCA            |
| <i>Apob</i>            | TCACAGCAACTGGAATGAGG - GCTTCGAGAGAGGAGCACAC           |
| <i>Lrp1</i>            | ACCACCATCGTGAAAATG - GTCCCAGCCACGGTGATA               |
| <i>Scarb1</i>          | GCCCATCATCTGCCAACT - TCCTGGGAGCCCTTTTACT              |
| <i>Pltp</i>            | GCTTCTGAGGGCCACCTAC - TTCAGCTTCAGTGGGGAGTT            |
| <i>Abca1</i>           | CTGTTTCCCCCAACTTCTG - TCTGCTCCATCTCTGCTTTC            |
| <i>Abcg1</i>           | TCTTTGATGAGCCCACCAGT - GGGCCAGTCCTTTCATCA             |
| <i>Abcg4</i>           | TGATGTGCCCTTCCAGGT - CAAGGCTGAGAAGAGCAGGA             |
| <i>Srebp2</i>          | ACCTAGACCTCGCCAAAGGT - GCACGGATAAGCAGGTTTGT           |
| <i>Npc1</i>            | CCTTCGGGCCTCCATTG - TGTCACGGTTCATTGTTGTAAGA           |
| <i>Npc2</i>            | CCGGTGAAGAATGAATACCC - TTCTTTTGTGTCATCTTCAAGTTTCC     |
| <i>Cyp46a1</i>         | AACTTTGACACCTTCTTCTTGC - CCATCACTGTGAATGCCAGA         |
| <i>Ch25h</i>           | TGCTACAACGGTTCGGAGC - AGAAGCCCACGTAAGTGATGAT          |
| <i>Cyp27a1</i>         | ATGGGATCTTCATCGCACA - CGTTTAAGGCATCCGTGTAGA           |
| <i>Tnf</i>             | TGCCTATGTCTCAGCCTCTTC - GAGGCCATTTGGGAAGTTCT          |
| <i>Il1b</i>            | GCTACCAAAGTGGATATAATCAGGA - CCAGGTAGCTATGGTACTCCAGAA  |
| <i>Il2</i>             | CGCAGAGGTCCAAGTTCATCT - CGCAGAGGTCCAAGTTCATCT         |
| <i>Il6</i>             | GCTACCAAAGTGGATATAATCAGGA - CCAGGTAGCTATGGTACTCCAGAA  |
| <i>Ccl2</i>            | GCCTGCTGTTACAGTTGC - CAGGTGAGTGGGGCGTTA               |
| <i>Cxcl10</i>          | GCTGCCGTCATTTTCTGC - TCTCACTGGCCCCTCATC               |
| <i>Ifng</i>            | TCAAGTGGCATAGATGTGGAAGAA - TGGCTCTGCAGGATTTTCATG      |
| <i>H2-DMb2 (Mhcll)</i> | CGCAGTGGGCGAGTACC - CATTCCGGAACCAGCGCA                |
| <i>Nos2</i>            | TGAACCTTGAGCGAGGAGCA - TTCATGATAACGTTTCTGGCTCT        |
| <i>Csf2</i>            | GGGCGCCTTGAACATGAC - CGCATAGGTGGTAACTTGTGTTTC         |
| <i>Fcgr3a</i>          | TCACCATCACTGTCCAAGACC - ACTAGGGAGAAAGCAGTGTGGT        |
| <i>Il10</i>            | GGTTGCCAAGCCTTATCGGA - ACCTGCTCCACTGCCTTGTCT          |
| <i>Il12</i>            | CCAGGTGTCTTAGCCAGTCC - GCAGTGCAGGAATAATGTTTCA         |
| <i>Tgfb1</i>           | TGGAGCAACATGTGGAAGT - CAGCAGCCGGTTACCAAG              |
| <i>Mrc1</i>            | AAGGAAAGTCCCAGATGTACC - GCAAGCCAATGTACACGATG          |
| <i>Arg1</i>            | AAGGAAAGTCCCAGATGTACC - GCAAGCCAATGTACACGATG          |
| <i>Nlrp3</i>           | TGCGTGTCTCTGTATACCAC - GGCTTAGGTCCACACAGAAAG          |
| <i>Casp1</i>           | CCCACTGCTGATAGGGTGAC - GCATAGGTACATAAGAATGAACTGGA     |

**Supplementary Table 5: Differentially expressed genes in SQS/McKO and ABC/McKO mutants during remyelination  
Related to figure 2**

| Gene expression of SQS/McKO and ABC/McKO cuprizone corpus callosum samples over control |              |                 |          |                            |
|-----------------------------------------------------------------------------------------|--------------|-----------------|----------|----------------------------|
| Gene name and function                                                                  | Gene symbol  | Fold expression |          | P-value (Student's t-test) |
|                                                                                         |              | SQS/McKO        | ABC/McKO |                            |
| Carbonic Anhydrase 2                                                                    | <i>Car2</i>  | 0.31            | 1.78     | 0.0005                     |
| Proteolipid protein 1                                                                   | <i>Plp1</i>  | 0.47            | 0.38     | 0.3339                     |
| ATP binding cassette subfamily A member 1                                               | <i>Abca1</i> | 0.49            | 0.12     | 0.0132                     |
| ATP binding cassette subfamily G member 1                                               | <i>Abcg1</i> | 0.52            | 0.65     | 0.0184                     |
| Allograft Inflammatory Factor 1                                                         | <i>Aif1</i>  | 1.33            | 0.51     | 0.0002                     |
| Nitric oxide synthase 2                                                                 | <i>Nos2</i>  | 2.20            | 0.44     | 0.0001                     |
| Fc Fragment Of IgG Receptor IIIa                                                        | <i>Fcgr3</i> | 1.56            | 0.51     | 0.0014                     |
| Interleukin 12                                                                          | <i>Il12</i>  | 1.61            | 0.66     | 0.0161                     |
| Arginase 1                                                                              | <i>Arg1</i>  | 0.99            | 2.76     | 0.0235                     |
| Interleukin 10                                                                          | <i>Il10</i>  | 0.16            | 5.74     | 0.0100                     |

**Supplementary Table 6: Upregulated genes in SQS/McKO during myelin disease**  
**Related to figure 3**

| <b>Targeted expression profile in SQS/McKO over control</b> |                    |                                   |                        |
|-------------------------------------------------------------|--------------------|-----------------------------------|------------------------|
| <b>Gene name and function</b>                               | <b>Gene symbol</b> | <b>P-value (Student's t-test)</b> | <b>Fold expression</b> |
| <b>Cuprizone, corpus callosum</b>                           |                    |                                   |                        |
| Allograft inflammatory factor 1                             | <i>Aif1</i>        | 0.008                             | 2.89                   |
| Apolipoprotein B receptor                                   | <i>Apobr</i>       | 0.013                             | 2.21                   |
| Aquaporin 4                                                 | <i>Aqp4</i>        | 0.000                             | 2.33                   |
| CC-chemokine ligand 2                                       | <i>Ccl2</i>        | 0.001                             | 2.30                   |
| Cholesterol 25-Hydroxylase                                  | <i>Ch25h</i>       | 0.025                             | 1.65                   |
| C-X-C motif chemokine 10                                    | <i>Cxcl10</i>      | 0.010                             | 1.67                   |
| Fc Fragment Of IgG Receptor IIIa                            | <i>Fcgr3a</i>      | 0.009                             | 1.61                   |
| Interleukin 12A                                             | <i>Il12a</i>       | 0.014                             | 1.83                   |
| Interleukin 1 beta                                          | <i>Il1b</i>        | 0.036                             | 1.59                   |
| Interleukin 6                                               | <i>Il6</i>         | 0.014                             | 1.95                   |
| Lysosome-associated membrane protein 2                      | <i>Lamp2</i>       | 0.004                             | 1.58                   |
| Low density lipoprotein-related protein 2                   | <i>Lrp2</i>        | 0.035                             | 1.96                   |
| Nitric oxide synthase 2                                     | <i>Nos2</i>        | 0.000                             | 2.13                   |
| Platelet-derived growth factor receptor A                   | <i>Pdgfra</i>      | 0.006                             | 1.47                   |
| Scavenger Receptor Class B Member 1                         | <i>Scarb1</i>      | 0.005                             | 1.50                   |
| Tumor necrosis factor                                       | <i>Tnf</i>         | 0.000                             | 2.76                   |
| <b>EAE, spinal cord</b>                                     |                    |                                   |                        |
| CC-chemokine ligand 2                                       | <i>Ccl2</i>        | 0.035                             | 2.81                   |
| C-X-C motif chemokine 10                                    | <i>Cxcl10</i>      | 0.038                             | 2.80                   |
| Interleukin 12                                              | <i>Il12</i>        | 0.022                             | 3.09                   |
| Interleukin 1 beta                                          | <i>Il1b</i>        | 0.030                             | 2.09                   |
| Interleukin 2                                               | <i>Il2</i>         | 0.037                             | 5.16                   |
| Nitric oxide synthase 2                                     | <i>Nos2</i>        | 0.000                             | 2.00                   |
| Tumor necrosis factor                                       | <i>Tnf</i>         | 0.043                             | 1.68                   |
| <b>Cuprizone, isolated CD11b+ cells</b>                     |                    |                                   |                        |
| Cholesterol 25-Hydroxylase                                  | <i>Ch25h</i>       | 0.042                             | 3.24                   |
| Colony Stimulating Factor 2                                 | <i>Csf2</i>        | 0.010                             | 4.50                   |
| C-X-C motif chemokine 10                                    | <i>Cxcl10</i>      | 0.003                             | 2.77                   |
| Interleukin 1 beta                                          | <i>Il1b</i>        | 0.010                             | 1.71                   |
| LDL receptor related protein 1                              | <i>Lrp1</i>        | 0.038                             | 3.50                   |
| Nitric oxide synthase 2                                     | <i>Nos2</i>        | 0.034                             | 3.23                   |
| Tumor necrosis factor                                       | <i>Tnf</i>         | 0.015                             | 1.97                   |
| <b>EAE, isolated CD11b+ cells</b>                           |                    |                                   |                        |
| Colony Stimulating Factor 2                                 | <i>Csf2</i>        | 0.009                             | 4.09                   |
| C-X-C motif chemokine 10                                    | <i>Cxcl10</i>      | 0.007                             | 3.13                   |
| Fc Fragment Of IgG Receptor IIIa                            | <i>Fcgr3a</i>      | 0.012                             | 2.84                   |
| Interferon gamma                                            | <i>Ifnng</i>       | 0.008                             | 3.68                   |
| Interleukin 1 beta                                          | <i>Il1b</i>        | 0.045                             | 1.95                   |
| Nitric oxide synthase 2                                     | <i>Nos2</i>        | 0.029                             | 6.09                   |
| Phospholipid-transferprotein                                | <i>Pltp</i>        | 0.031                             | 7.30                   |

**Supplementary Table 7: Downregulated genes in SQS/McKO during myelin disease,  
Related to figure 3**

| <b>Targeted expression profile in SQS/McKO over control</b> |                    |                                       |                        |
|-------------------------------------------------------------|--------------------|---------------------------------------|------------------------|
| <b>Gene name and function</b>                               | <b>Gene symbol</b> | <b>P-value<br/>(Student's t-test)</b> | <b>Fold expression</b> |
| <b>Cuprizone, tissue</b>                                    |                    |                                       |                        |
| ATP binding cassette subfamily A member 1                   | <i>Abca1</i>       | 0.003                                 | 0.53                   |
| ATP binding cassette subfamily G member 1                   | <i>Abcg1</i>       | 0.008                                 | 0.53                   |
| Apolipoprotein D                                            | <i>Apod</i>        | 0.040                                 | 0.68                   |
| Apolipoprotein E                                            | <i>ApoE</i>        | 0.008                                 | 0.58                   |
| Carbonic anhydrase II                                       | <i>Car2</i>        | 0.000                                 | 0.29                   |
| Cholesterol 27-hydroxylase                                  | <i>Cyp27a1</i>     | 0.047                                 | 0.74                   |
| Lanosterol 14 alpha-demethylase                             | <i>Cyp51</i>       | 0.000                                 | 0.59                   |
| 24-dehydrocholesterol reductase                             | <i>Dhcr24</i>      | 0.002                                 | 0.63                   |
| Farnesyl-diphosphate farnesyltransferase 1                  | <i>Fdft1</i>       | 0.003                                 | 0.49                   |
| Interleukin 10                                              | <i>Il10</i>        | 0.004                                 | 0.14                   |
| Low density lipoprotein receptor                            | <i>Ldlr</i>        | 0.000                                 | 0.28                   |
| Mevalonate kinase                                           | <i>Mvk</i>         | 0.000                                 | 0.65                   |
| Proteolipid protein 1                                       | <i>Plp1</i>        | 0.000                                 | 0.47                   |
| Sterol regulatory element-binding protein-2                 | <i>Srebp2</i>      | 0.001                                 | 0.59                   |
| Transforming growth factor beta 1                           | <i>Tgfb1</i>       | 0.046                                 | 0.54                   |
| <b>EAE, tissue</b>                                          |                    |                                       |                        |
| ATP binding cassette subfamily A member 1                   | <i>Abca1</i>       | 0.003                                 | 0.52                   |
| Apolipoprotein E                                            | <i>ApoE</i>        | 0.002                                 | 0.61                   |
| Cholesterol 27-hydroxylase                                  | <i>Cyp27a1</i>     | 0.009                                 | 0.63                   |
| Farnesyl-diphosphate farnesyltransferase 1                  | <i>Fdft1</i>       | 0.011                                 | 0.69                   |
| Glial fibrillary acidic protein                             | <i>Gfap</i>        | 0.034                                 | 0.75                   |
| Interferon gamma                                            | <i>Irfng</i>       | 0.038                                 | 0.22                   |
| Interleukin 10                                              | <i>Il10</i>        | 0.047                                 | 0.42                   |
| Low density lipoprotein receptor                            | <i>Ldlr</i>        | 0.048                                 | 0.53                   |
| Mevalonate kinase                                           | <i>Mvk</i>         | 0.022                                 | 0.60                   |
| Transforming growth factor beta 1                           | <i>Tgfb1</i>       | 0.013                                 | 0.37                   |
| Very low density lipoprotein receptor                       | <i>Vldlr</i>       | 0.033                                 | 0.59                   |
| <b>Cuprizone, isolated CD11b+ cells</b>                     |                    |                                       |                        |
| ATP binding cassette subfamily A member                     | <i>Abca1</i>       | 0.005                                 | 0.30                   |
| Apolipoprotein E                                            | <i>ApoE</i>        | 0.014                                 | 0.37                   |
| Cholesterol 24-hydroxylase                                  | <i>Cyp46a1</i>     | 0.010                                 | 0.12                   |
| Lanosterol 14 alpha-demethylase                             | <i>Cyp51</i>       | 0.029                                 | 0.55                   |
| Farnesyl-diphosphate farnesyltransferase 1                  | <i>Fdft1</i>       | 0.000                                 | 0.01                   |
| Interleukin 2                                               | <i>Il2</i>         | 0.022                                 | 0.14                   |
| Transforming growth factor beta 1                           | <i>Tgfb1</i>       | 0.033                                 | 0.27                   |
| <b>EAE, isolated CD11b+ cells</b>                           |                    |                                       |                        |
| ATP binding cassette subfamily A member 1                   | <i>Abca1</i>       | 0.047                                 | 0.20                   |
| ATP binding cassette subfamily G member 1                   | <i>Abcg1</i>       | 0.027                                 | 0.41                   |
| Apolipoprotein E                                            | <i>ApoE</i>        | 0.009                                 | 0.38                   |
| Cholesterol 25-hydroxylase                                  | <i>Ch25h</i>       | 0.038                                 | 0.23                   |
| Farnesyl-diphosphate farnesyltransferase 1                  | <i>Fdft1</i>       | 0.031                                 | 0.40                   |
| 3-Hydroxy-3-methylglutaryl-CoA reductase                    | <i>Hmgcr</i>       | 0.000                                 | 0.44                   |
| Transforming growth factor beta 1                           | <i>Tgfb1</i>       | 0.001                                 | 0.05                   |





**Supplementary Table 8: Top 25 Gene Ontologies of cluster 2,  
Related to figure 4**

|           | Gene Ontology                                                             | Size | <b>-log10<br/>(FDR q-val)</b> |
|-----------|---------------------------------------------------------------------------|------|-------------------------------|
| 1         | SRP-DEPENDENT COTRANSLATIONAL PROTEIN TARGETING TO MEMBRANE_GO:0006614    | 41   | Inf                           |
| 2         | ESTABLISHMENT OF PROTEIN LOCALIZATION TO ENDOPLASMIC RETICULUM_GO:0072599 | 45   | Inf                           |
| 3         | PROTEIN TARGETING TO MEMBRANE_GO:0006612                                  | 49   | Inf                           |
| <b>4</b>  | <b>REGULATION OF PLASMA LIPOPROTEIN PARTICLE LEVELS_GO:0097006</b>        | 20   | Inf                           |
| 5         | VIRAL TRANSCRIPTION_GO:0019083                                            | 44   | Inf                           |
| 6         | PROTEIN TARGETING TO ER_GO:0045047                                        | 44   | Inf                           |
| 7         | PROTEIN LOCALIZATION TO ENDOPLASMIC RETICULUM_GO:0070972                  | 48   | Inf                           |
| 8         | COTRANSLATIONAL PROTEIN TARGETING TO MEMBRANE_GO:0006613                  | 44   | Inf                           |
| 9         | PROTEIN TARGETING_GO:0006605                                              | 68   | Inf                           |
| 10        | NUCLEAR-TRANSCRIBED MRNA CATABOLIC PROCESS_GO:0000956                     | 58   | Inf                           |
| 11        | PROTEIN LOCALIZATION TO MEMBRANE_GO:0072657                               | 84   | Inf                           |
| 12        | TRANSLATION_GO:0006412                                                    | 62   | Inf                           |
| 13        | CYTOPLASMIC TRANSLATION_GO:0002181                                        | 17   | 3.9                           |
| 14        | INTERSPECIES INTERACTION BETWEEN ORGANISMS_GO:0044419                     | 101  | 3.9                           |
| 15        | ESTABLISHMENT OF PROTEIN LOCALIZATION TO ORGANELLE_GO:0072594             | 81   | 3.9                           |
| 16        | RNA CATABOLIC PROCESS_GO:0006401                                          | 65   | 3.7                           |
| 17        | EXTRACELLULAR STRUCTURE ORGANIZATION_GO:0043062                           | 46   | 3.7                           |
| 18        | REGULATED EXOCYTOSIS_GO:0045055                                           | 147  | 3.2                           |
| 19        | NEUTROPHIL DEGRANULATION_GO:0043312                                       | 119  | 3.2                           |
| <b>20</b> | <b>REGULATION OF LIPID LOCALIZATION_GO:1905952</b>                        | 33   | 3.3                           |
| 21        | ORGANIC CYCLIC COMPOUND CATABOLIC PROCESS_GO:1901361                      | 100  | 3.3                           |
| <b>22</b> | <b>REGULATION OF LIPID TRANSPORT_GO:0032368</b>                           | 21   | 3.0                           |
| 23        | REGULATION OF ENDOTHELIAL CELL MIGRATION_GO:0010594                       | 31   | 2.9                           |
| 24        | EXOCYTOSIS_GO:0006887                                                     | 158  | 2.7                           |
| 25        | POSITIVE REGULATION OF EPITHELIAL CELL MIGRATION_GO:0010634               | 34   | 2.7                           |

**Supplementary Table 9: Mean expression level of candidate genes in immune cell clusters, Related to figure 4**

|                      | Cluster 1 |       | Cluster 2 |       | Cluster 3 |      |
|----------------------|-----------|-------|-----------|-------|-----------|------|
|                      | Ctrl      | MS    | Ctrl      | MS    | Ctrl      | MS   |
| <b><i>DHCR24</i></b> | 0.16      | 0.10  | 0.45      | 0.06  | 1.216     | 1.05 |
| <b><i>ABCA1</i></b>  | 0.40      | 1.54  | 4.43      | 8.23  | 0.82      | 1.91 |
| <b><i>APOE</i></b>   | 8.63      | 13.17 | 68.78     | 78.51 | 7.43      | 8.23 |
| <b><i>NR1H2</i></b>  | 0.51      | 0.82  | 0.74      | 1.22  | 0.64      | 0.77 |
| <b><i>NR1H3</i></b>  | 0.035     | 0.04  | 0.21      | 0.64  | 0.04      | 0.24 |

**Supplementary Table 10: Patient characteristics**

|                  | <b>Diagnosis</b>                     | <b>Sex</b> | <b>Age</b> | <b>ApoE genotype</b> | <b>Post mortem delay</b> |
|------------------|--------------------------------------|------------|------------|----------------------|--------------------------|
| <b>Patient 1</b> | Multiple sclerosis                   | m          | 47         | 33                   | 7:15                     |
| <b>Patient 2</b> | Multiple sclerosis                   | m          | 61         | N.A.                 | 9:15                     |
| <b>Patient 3</b> | Multiple sclerosis                   | f          | 47         | N.A.                 | 8:35                     |
| <b>Patient 4</b> | Multiple sclerosis                   | m          | 51         | 33                   | 11:00                    |
| <b>Control 1</b> | Non-demented control                 | m          | 49         | N.A.                 | 6:15                     |
| <b>Control 2</b> | Non-demented control                 | f          | 46         | 33                   | 10:25                    |
| <b>Control 3</b> | Control with space-occupying process | m          | 58         | N.A.                 | 05:15                    |

**Supplementary Table 11: Differentially expressed genes in squalene treated EAE mice, Related to Figure 6**

| <b>Targeted expression profile of squalene treated EAE over control EAE</b> |                    |                                   |                        |
|-----------------------------------------------------------------------------|--------------------|-----------------------------------|------------------------|
| <b>Gene name and function</b>                                               | <b>Gene symbol</b> | <b>P-value (Student's t-test)</b> | <b>Fold expression</b> |
| <b>EAE (tissue): Upregulated genes</b>                                      |                    |                                   |                        |
| ATP binding cassette subfamily A member 1                                   | <i>Abca1</i>       | 0.018                             | 3.39                   |
| ATP binding cassette subfamily G member 1                                   | <i>Abcg1</i>       | 0.027                             | 1.47                   |
| Apolipoprotein E                                                            | <i>ApoE</i>        | 0.000                             | 1.67                   |
| Clusterin (Apolipoprotein J)                                                | <i>Clu</i>         | 0.016                             | 2.26                   |
| Lanosterol 14 alpha-demethylase                                             | <i>Cyp51</i>       | 0.045                             | 1.82                   |
| 24-dehydrocholesterol reductase                                             | <i>Dhcr24</i>      | 0.028                             | 2.78                   |
| Fc Fragment Of IgG Receptor IIIa                                            | <i>Fcgr3a</i>      | 0.004                             | 2.58                   |
| Farnesyl-diphosphate farnesyltransferase 1                                  | <i>Fdft1</i>       | 0.009                             | 1.96                   |
| 3-Hydroxy-3-methylglutaryl-CoA reductase                                    | <i>Hmgcr</i>       | 0.021                             | 2.64                   |
| 3-Hydroxy-3-Methylglutaryl-CoA Synthase 1                                   | <i>Hmgcs1</i>      | 0.020                             | 2.14                   |
| Interleukin 10                                                              | <i>Il10</i>        | 0.035                             | 4.34                   |
| Low density lipoprotein receptor                                            | <i>Ldlr</i>        | 0.038                             | 2.24                   |
| Low density lipoprotein-related protein 1                                   | <i>Lrp1</i>        | 0.041                             | 2.28                   |
| Mevalonate kinase                                                           | <i>Mvk</i>         | 0.025                             | 1.55                   |
| Phospholipid-transferprotein                                                | <i>Pltp</i>        | 0.008                             | 1.88                   |
| Transforming growth factor beta 1                                           | <i>Tgfb1</i>       | 0.042                             | 8.32                   |
| <b>EAE (CD11b+ cells): Upregulated genes</b>                                |                    |                                   |                        |
| ATP binding cassette subfamily A member 1                                   | <i>Abca1</i>       | 0.039                             | 6.38                   |
| Apolipoprotein E                                                            | <i>ApoE</i>        | 0.040                             | 2.89                   |
| Arginase 1                                                                  | <i>Arg1</i>        | 0.004                             | 5.97                   |
| Clusterin (Apolipoprotein J)                                                | <i>Clu</i>         | 0.001                             | 8.46                   |
| Farnesyl-diphosphate farnesyltransferase 1                                  | <i>Fdft1</i>       | 0.001                             | 12.44                  |
| Transforming growth factor beta 1                                           | <i>Tgfb1</i>       | 0.002                             | 18.26                  |
| <b>EAE (tissue): Downregulated genes</b>                                    |                    |                                   |                        |
| Colony Stimulating Factor 2                                                 | <i>Csf2</i>        | 0.014                             | 0.53                   |
| Cholesterol 24-hydroxylase                                                  | <i>Cyp46a1</i>     | 0.019                             | 0.73                   |
| Interferon gamma                                                            | <i>Ifng</i>        | 0.019                             | 0.68                   |
| Interleukin 12A                                                             | <i>Il12a</i>       | 0.005                             | 0.39                   |
| Nitric oxide synthase 2                                                     | <i>Nos2</i>        | 0.003                             | 0.54                   |
| Tumor necrosis factor                                                       | <i>Tnf</i>         | 0.015                             | 0.61                   |
| <b>EAE (CD11b+ cells): Downregulated genes</b>                              |                    |                                   |                        |
| 3-Hydroxy-3-Methylglutaryl-CoA Synthase 1                                   | <i>Hmgcs1</i>      | 0.010                             | 0.37                   |
| Cholesterol 25-hydroxylase                                                  | <i>Ch25h</i>       | 0.001                             | 0.07                   |
| Tumor necrosis factor                                                       | <i>Tnf</i>         | 0.033                             | 0.38                   |
| Interleukin 2                                                               | <i>Il2</i>         | 0.001                             | 0.06                   |
| C-X-C motif chemokine 10                                                    | <i>Cxcl10</i>      | 0.018                             | 0.34                   |
| Interferon gamma                                                            | <i>Ifng</i>        | 0.039                             | 0.37                   |
| Nitric oxide synthase 2                                                     | <i>Nos2</i>        | 0.001                             | 0.13                   |
| Colony Stimulating Factor 2                                                 | <i>Csf2</i>        | 0.031                             | 0.32                   |
| Low density lipoprotein receptor                                            | <i>Ldlr</i>        | 0.028                             | 0.13                   |
| Scavenger Receptor Class B Member 1                                         | <i>Scarb1</i>      | 0.046                             | 0.13                   |



**Supplementary Table 12: Resource table**

| Reagent                                             | Source                        | Identifier         |
|-----------------------------------------------------|-------------------------------|--------------------|
| <b>Antibodies</b>                                   |                               |                    |
| ABCA1                                               | Santa Cruz                    | Cat#sc-58219       |
| ACSA-2                                              | Miltenyi biotec               | Cat #130-097-679   |
| CAII                                                | S. Ghandour                   | N/A                |
| CD11b                                               | Biologend                     | Cat # 101207       |
| CD11b                                               | Miltenyi biotec               | Cat #130-093-636   |
| CD31                                                | Miltenyi biotec               | Cat #130-091-935   |
| CD3e                                                | Biologend                     | Cat # 100312       |
| CD4                                                 | Becton Dickinson              | Cat # 553730       |
| CD45.2                                              | Biologend                     | Cat # 109814       |
| CD8                                                 | Becton Dickinson              | Cat # 100706       |
| GAPDH                                               | Enzo                          | Cat #ADI-CSA-335-E |
| GFAP                                                | Chemicon                      | Cat #MAB3402       |
| Iba1                                                | Wako                          | Cat #019-19741     |
| KiM1P                                               | HJ Radzun                     | N/A                |
| LAMP1                                               | BD Pharmingen                 | Cat #09671D        |
| MAC3                                                | Pharmigen                     | Cat #01781D        |
| MBP                                                 | Serotec                       | Cat #MCA 4095      |
| O4                                                  | Miltenyi biotec               | Cat #130-096-670   |
| OLIG2                                               | C. Stiles / J. Alberta        | DF308              |
| SMI31                                               | Covance                       | Cat #SMI31P        |
| <b>Chemicals, Peptides and Recombinant proteins</b> |                               |                    |
| 2',7'-Dichlorofluorescein                           | Sigma-Aldrich                 | Cat #D6665         |
| 2',7'-Dichlorofluorescein                           | Sigma-Aldrich                 | Cat #D6665         |
| 4-hydroxytamoxifen                                  | Sigma-Aldrich                 | Cat #T176          |
| Accustase                                           | Innovative Cell Technologies  | Cat #AT104-500     |
| BC theta                                            | Max-Planck-Institute (MPI-EM) | N.A.               |
| Betaferon (IFN $\beta$ -1b)                         | BAYER                         | Cat #04674936      |
| Cholesterol                                         | HEW                           | Cat #60211         |
| Corn oil                                            | Sigma-Aldrich                 | Cat #C8267         |
| Cuprizone                                           | Sigma-Aldrich                 | Cat #14690         |
| DMHCA                                               | Avanti                        | Cat #700125P       |
| Fluoromyelin                                        | ThermoFisher Scientific       | Cat #F34651        |
| Lipopolysaccharides (LPS)                           | Sigma-Aldrich                 | Cat #L3012         |
| Lymphocyte separation medium                        | PAA                           | Cat #LSM1077       |
| Lysolecithin                                        | Sigma-Aldrich                 | Cat #L4129         |
| M. tuberculosis H37 Ra                              | BD                            | Cat #231141        |
| MOG35-55                                            | Max-Planck-Institute (MPI-EM) | N.A.               |
| Monastral blue                                      | Sigma-Aldrich                 | Cat #274011        |
| PageRuler <sup>TM</sup>                             | ThermoFisher Scientific       | Cat #26619         |
| Pertussis toxin                                     | Sigma-Aldrich                 | Cat #P7208         |
| PhosSTOP <sup>TM</sup>                              | Roche                         | Cat #4906845001    |
| Squalene                                            | Sigma-Aldrich                 | Cat #S3626         |
| Tamoxifen                                           | Sigma-Aldrich                 | Cat #T5648         |
| Lipid depleted serum (LDS)                          | Biowest-bw                    | Cat #S181L-500     |
| Cholesterol                                         | HEW                           | Cat #60211         |

|                                               |                                                                         |                                                                                                                   |
|-----------------------------------------------|-------------------------------------------------------------------------|-------------------------------------------------------------------------------------------------------------------|
| Desmosterol                                   | Sigma-Aldrich                                                           | Cat #700060P                                                                                                      |
| Lathosterol                                   | Sigma-Aldrich                                                           | Cat #C3652                                                                                                        |
| Lanosterol                                    | Sigma-Aldrich                                                           | Cat #L5768                                                                                                        |
| <b>Critical Commercial Assays</b>             |                                                                         |                                                                                                                   |
| Adult Brain Dissociation Kit                  | Miltenyi biotec                                                         | Cat #130-107-677                                                                                                  |
| DAB Substrate Kit                             | Zymomed                                                                 | Cat #DAB057                                                                                                       |
| LSAB®2 System-HRP                             | Dako                                                                    | Cat #K0609                                                                                                        |
| Ovation Pico WTA System V2                    | NuGEN                                                                   | Cat #3302                                                                                                         |
| RNeasy Mini Kit                               | Qiagen                                                                  | Cat #74104                                                                                                        |
| VECTASTAIN® Elite® ABC HRP Kit                | VECTOR                                                                  | Cat #PK-6100                                                                                                      |
| <b>Biological samples</b>                     |                                                                         |                                                                                                                   |
| Human Brain tissue                            | Netherland Brain Bank                                                   | <a href="https://www.brainbank.nl/">https://www.brainbank.nl/</a>                                                 |
| <b>Experimental Models: Organisms/Strains</b> |                                                                         |                                                                                                                   |
| Plp1-CreERT2                                  | Max-Planck-Institute (MPI-EM)                                           | Leone, et al., 2003                                                                                               |
| NG2-CreERT2                                   | Max-Planck-Institute (MPI-EM)                                           | Huang, et al., 2014                                                                                               |
| GLAST-CreERT2                                 | Max-Planck-Institute (MPI-EM)                                           | Mori, et al., 2006                                                                                                |
| CX3CR1-CreERT2 (Line 1)                       | Max-Planck-Institute (MPI-EM)                                           | Parkhurst, et al., 2013                                                                                           |
| CX3CR1-CreERT2 (Line 2)                       | Max-Planck-Institute (MPI-EM)                                           | Yona, et al., 2013                                                                                                |
| SLCO1c1-CreERT2                               | Max-Planck-Institute (MPI-EM)                                           | Ridder, et al., 2011                                                                                              |
| Aldh1l1-CreERT2                               | Max-Planck-Institute (MPI-EM)                                           | Winchenbach et al., 2016                                                                                          |
| SQSFlox/Flox                                  | Max-Planck-Institute (MPI-EM)                                           | Saher et al., 2005                                                                                                |
| Abca1 <sup>Flox/Flox</sup>                    | Max-Planck-Institute (MPI-EM)                                           | Westerterp, et al., 2012                                                                                          |
| Abcg1 <sup>Flox/Flox</sup>                    | Max-Planck-Institute (MPI-EM)                                           | Westerterp, et al., 2012                                                                                          |
| MBP <sup>Flox/Flox</sup>                      | Max-Planck-Institute (MPI-EM)                                           | Meschkat et al., 2020                                                                                             |
| Rosa26-tdTomato                               | Max-Planck-Institute (MPI-EM)                                           | Madisen, et al., 2010                                                                                             |
| ApoEKO (ApoE -/-)                             | Max-Planck-Institute (MPI-EM)                                           | Piedrahita, et al., 1992                                                                                          |
| <b>Experimental Models: Cell lines</b>        |                                                                         |                                                                                                                   |
| L929                                          | N/A                                                                     | Garcia-Agudo, et al., 2019                                                                                        |
| <b>Oligonucleotides</b>                       |                                                                         |                                                                                                                   |
| Primer, Table S1                              | This paper                                                              | N/A                                                                                                               |
| <b>Original source data</b>                   |                                                                         |                                                                                                                   |
| GSE118257                                     | <a href="https://www.ncbi.nlm.nih.gov">https://www.ncbi.nlm.nih.gov</a> | Jakel et al., 2019                                                                                                |
| GSE124335                                     | <a href="https://www.ncbi.nlm.nih.gov">https://www.ncbi.nlm.nih.gov</a> | Masuda et al., 2019                                                                                               |
| <b>Software and Algorithms</b>                |                                                                         |                                                                                                                   |
| Cellprofiler                                  | McQuin, et al., 2018                                                    | <a href="http://www.cellprofiler.org">www.cellprofiler.org</a>                                                    |
| GraphPad Prism 6                              | GraphPad Software, Inc.                                                 | <a href="https://www.graphpad.com/">https://www.graphpad.com/</a>                                                 |
| ImageJ (Fiji)                                 | Schindelin, et al., 2012                                                | <a href="https://imagej.nih.gov/ij/">https://imagej.nih.gov/ij/</a>                                               |
| InteractiVenn                                 | Heberle, et al., 2015                                                   | <a href="http://www.interactivenn.net/">http://www.interactivenn.net/</a>                                         |
| LAS X software                                | Leica-microsystems                                                      | <a href="https://www.leica-microsystems.com">https://www.leica-microsystems.com</a>                               |
| R                                             | This paper                                                              | <a href="https://www.r-statistik.de">https://www.r-statistik.de</a>                                               |
| R package ggplot2 v3.2.0                      | Wickham, 2009                                                           | <a href="https://cran.r-project.org">https://cran.r-project.org</a>                                               |
| R package Seurat v3.1.0                       | Butler et al., 2018                                                     | <a href="https://satijalab.org">https://satijalab.org</a>                                                         |
| GSEA                                          | Subramanian et al., 2005                                                | <a href="http://software.broadinstitute.org/gsea/index.jsp">http://software.broadinstitute.org/gsea/index.jsp</a> |
| Cytoscape v3.7.1                              | Otasek, et al., 2019                                                    | <a href="https://cytoscape.org">https://cytoscape.org</a>                                                         |
| ZEN 2012 blue edition                         | Zeiss                                                                   | <a href="https://www.zeiss.de">https://www.zeiss.de</a>                                                           |

78. Leone, D.P., *et al.* Tamoxifen-inducible glia-specific Cre mice for somatic mutagenesis in oligodendrocytes and Schwann cells. *Molecular and cellular neurosciences* **22**, 430-440 (2003).
79. Huang, W., *et al.* Novel NG2-CreERT2 knock-in mice demonstrate heterogeneous differentiation potential of NG2 glia during development. *Glia* **62**, 896-913 (2014).
80. Mori, T., *et al.* Inducible gene deletion in astroglia and radial glia--a valuable tool for functional and lineage analysis. *Glia* **54**, 21-34 (2006).
81. Parkhurst, C.N., *et al.* Microglia promote learning-dependent synapse formation through brain-derived neurotrophic factor. *Cell* **155**, 1596-1609 (2013).
82. Yona, S., *et al.* Fate mapping reveals origins and dynamics of monocytes and tissue macrophages under homeostasis. *Immunity* **38**, 79-91 (2013).
83. Ridder, D.A., *et al.* TAK1 in brain endothelial cells mediates fever and lethargy. *J Exp Med* **208**, 2615-2623 (2011).
84. Westerterp, M., *et al.* Regulation of hematopoietic stem and progenitor cell mobilization by cholesterol efflux pathways. *Cell stem cell* **11**, 195-206 (2012).
85. Madisen, L., *et al.* A robust and high-throughput Cre reporting and characterization system for the whole mouse brain. *Nature neuroscience* **13**, 133-140 (2010).
86. Piedrahita, J.A., Zhang, S.H., Hagaman, J.R., Oliver, P.M. & Maeda, N. Generation of mice carrying a mutant apolipoprotein E gene inactivated by gene targeting in embryonic stem cells. *Proceedings of the National Academy of Sciences of the United States of America* **89**, 4471-4475 (1992).
87. Garcia-Agudo, L.F., *et al.* Genetically induced brain inflammation by Cnp deletion transiently benefits from microglia depletion. *FASEB journal : official publication of the Federation of American Societies for Experimental Biology* **33**, 8634-8647 (2019).
88. McQuin, C., *et al.* CellProfiler 3.0: Next-generation image processing for biology. *PLoS biology* **16**, e2005970 (2018).
89. Schindelin, J., *et al.* Fiji: an open-source platform for biological-image analysis. *Nat Methods* **9**, 676-682 (2012).
90. Heberle, H., Meirelles, G.V., da Silva, F.R., Telles, G.P. & Minghim, R. InteractiVenn: a web-based tool for the analysis of sets through Venn diagrams. *BMC bioinformatics* **16**, 169 (2015).
91. Otasek, D., Morris, J.H., Boucas, J., Pico, A.R. & Demchak, B. Cytoscape Automation: empowering workflow-based network analysis. *Genome biology* **20**, 185 (2019).
